# Supplementary material
Source: PubMed Central journal article supplement (PMC4069985)
Supplement: NIHMS58827-supplement-Supplement1.pdf [file NIHMS58827-supplement-Supplement1.pdf]

## Supplementary Appendix

This appendix has been provided by the authors to give readers additional information about their work.

Supplement to: Anderson ST, Kaforou M, Brent AJ, et al. Diagnosis of childhood tuberculosis and host RNA expression in Africa. *N Engl J Med* 2014;370:1712-23. DOI: 10.1056/NEJMoa1303657

## Supplementary Appendix

|                                                                                                                                                                                                                        |           |
|------------------------------------------------------------------------------------------------------------------------------------------------------------------------------------------------------------------------|-----------|
| <b>MEMBERS OF THE STUDY CONSORTIUM .....</b>                                                                                                                                                                           | <b>2</b>  |
| <b>SUPPLEMENTARY METHODS.....</b>                                                                                                                                                                                      | <b>3</b>  |
| <i>Study sites.....</i>                                                                                                                                                                                                | <i>3</i>  |
| <i>Patient screening and recruitment.....</i>                                                                                                                                                                          | <i>4</i>  |
| <i>Laboratory diagnosis.....</i>                                                                                                                                                                                       | <i>4</i>  |
| <i>RNA sample extraction and processing.....</i>                                                                                                                                                                       | <i>4</i>  |
| <i>C-reactive protein measurements.....</i>                                                                                                                                                                            | <i>5</i>  |
| <b>SUPPLEMENTARY STATISTICAL METHODS .....</b>                                                                                                                                                                         | <b>5</b>  |
| <i>Microarray analysis.....</i>                                                                                                                                                                                        | <i>5</i>  |
| <i>Disease risk score.....</i>                                                                                                                                                                                         | <i>6</i>  |
| <i>Analysis of validation dataset.....</i>                                                                                                                                                                             | <i>7</i>  |
| <i>Calculation of effective sensitivity in culture-negative TB groups.....</i>                                                                                                                                         | <i>7</i>  |
| <i>Positive and negative predictive value for combined culture positive and culture negative TB.....</i>                                                                                                               | <i>8</i>  |
| <b>SUPPLEMENTARY FIGURES.....</b>                                                                                                                                                                                      | <b>10</b> |
| <i>Figure S1a. Recruitment at Red Cross War Memorial Children’s Hospital, Cape Town, SA.....</i>                                                                                                                       | <i>10</i> |
| <i>Figure S1b. Recruitment at Queen Elizabeth Central Hospital, Blantyre, Malawi.....</i>                                                                                                                              | <i>11</i> |
| <i>Figure S1c. Recruitment of validation cohort at Kilifi District Hospital &amp; Coast Provincial General Hospital, Coast Province, Kenya.....</i>                                                                    | <i>12</i> |
| <i>Figure S2. Principal components analysis of the microarrayed samples in the discovery cohort (South Africa and Malawi).....</i>                                                                                     | <i>13</i> |
| <i>Figure S3. Disease risk scores and Receiver Operator Characteristic curves based on the TB/OD 51-transcript signature applied to the test set and the validation cohort.....</i>                                    | <i>14</i> |
| <i>Figure S4. Disease risk scores and Receiver Operator Characteristic curves based on the TB/LTBI 42-transcript signature applied to the test set and the validation cohort.....</i>                                  | <i>15</i> |
| <i>Figure S5. Disease risk scores and Receiver Operator Characteristic curves based on the TB/OD 51-transcript signature applied to the validation cohort by HIV status.....</i>                                       | <i>16</i> |
| <i>Figure S6. Serum CRP measurements in patients from the validation cohort.....</i>                                                                                                                                   | <i>17</i> |
| <b>SUPPLEMENTARY TABLES .....</b>                                                                                                                                                                                      | <b>18</b> |
| <i>Table S1a. Clinical features of children in the South Africa/Malawi discovery cohort.....</i>                                                                                                                       | <i>18</i> |
| <i>Table S1b. Major clinical diagnoses in the ‘Other Diseases’ groups from each study site.....</i>                                                                                                                    | <i>20</i> |
| <i>Table S2a. 42-transcript signature for distinguishing TB from latent TB infection.....</i>                                                                                                                          | <i>21</i> |
| <i>Table S2b. 51-transcript signature for distinguishing TB from other diseases.....</i>                                                                                                                               | <i>23</i> |
| <i>Table S3. Diagnostic performance of the disease risk score based on the TB vs. LTBI signature in the SA/Malawi test set.....</i>                                                                                    | <i>25</i> |
| <i>Table S4. Strategy for selection of culture-negative TB.....</i>                                                                                                                                                    | <i>26</i> |
| <i>Table S5a. Comparison of culture-negative TB cases included in &amp; excluded from the array analysis by diagnostic category for the validation cohort.....</i>                                                     | <i>27</i> |
| <i>Table S5b. Comparison of OD cases included in &amp; excluded from the array analysis by diagnostic category for the validation cohort.....</i>                                                                      | <i>28</i> |
| <i>Table S6. Diagnostic performance of the TB/OD disease risk score in the SA/Malawi test set and the Kenyan validation cohort and comparison with Xpert MTB/RIF by HIV status.....</i>                                | <i>29</i> |
| <i>Table S7. Diagnostic performance of the TB/OD disease risk score and the Xpert MTB/RIF on culture-negative TB samples from the Kenyan validation cohort.....</i>                                                    | <i>30</i> |
| <i>Table S8. Positive and Negative predictive value for the Kenyan validation cohort in different prevalence scenarios &amp; based on the sensitivity in both culture-negative and culture-positive TB groups.....</i> | <i>31</i> |
| <b>REFERENCES.....</b>                                                                                                                                                                                                 | <b>32</b> |

## **Members of the study consortium**

**ILULU Consortium members: Institute of Infectious Diseases and Molecular Medicine, University of Cape Town** Nonzwakazi Bangani, Lizl Bashe, Melina Carr, Hannah P. Gideon, Rene Goliath, Yekiwe Hlombe, Vanessa January, Bekekile Kwaza, Suzaan Marais, Marc Mendelson, Tolu Oni, Fadheela Patel, Ronnett Seldon, Relebohile Tsekela, Katalin A. Wilkinson, Robert J. Wilkinson, Kathryn Wood; **London School of Hygiene and Tropical Medicine/Karonga Prevention Study** Lyn Ambrose, Amelia C. Crampin, Hazel M. Dockrell, Neil French, Lumbani Munthali, Bagrey Ngwira, Amos Phiri, Femia Zgambo; **Red Cross War Memorial Children's Hospital, University of Cape Town** Margaret Cooper, Brian Eley, Mabel Gcuwa, Spasina King, Glynis Kossew, Karen McCabe, Wonita Petersen, Sandra Pienaar, Vashini Pillay; **Liverpool School of Tropical Medicine/Malawi-Liverpool-Wellcome Trust Clinical Research Programme, University of Malawi College of Medicine** Benjamin Allubha, George Chagaluka, Angeziwa Chunga, Janet Dube, Robert S. Heyderman, Annie Joabe, Martha Kalemba, Anne Kerr, Monica Matola, Rachel Mlotha, Agnes Mwale, David Mzinza; **Brighton and Sussex Medical School, University of Sussex** Suzanne T. Anderson, Gillian Baker, Claire M. Banwell, Terry Bishop, Natalie Chaplin, Julian Golland, Florian Kern, Susan Poore, Jayne Wellington; **Imperial College London** Lachlan J. Coin, Harieta Eleftherohorinou, Melissa Shea Hamilton, Myrsini Kaforou, Paul R. Langford, Michael Levin, Stephanie Menikou, Victoria J. Wright.

**KIDS study group:** Victor Bandika, Jay Berkley, Andrew Brent, Joyce Langat, Kath Maitland, Susan Morpeth, Daisy Mugo, Carole Mulunda, Robert Musyimi, Agnes Mutiso, Charles Newton, John Paul Odhiambo, Anthony Scott, Hemed Twahir, Joshua Wambua.

## **Supplementary Methods**

### ***Study sites***

Children were recruited to the discovery cohort at study sites in South Africa and Malawi, and to the validation cohort at a third study site in Kenya.

#### Red Cross War Memorial Children's Hospital, Cape Town, South Africa

The Red Cross War Memorial Children's Hospital is a tertiary referral hospital in the Western Cape Province of South Africa (SA), serving a predominantly urban population in and around Cape Town. South Africa has one of the highest pediatric TB incidence rates worldwide (981 per 100,000)<sup>1</sup>, as well as one of the most widespread national pediatric HIV epidemics.<sup>2,3</sup> Despite >98% infant BCG vaccination coverage, there is a high incidence of disseminated TB including TB meningitis.<sup>4</sup> Malnutrition and bacterial and helminth infections are common, but there is no malaria transmission in the Western Cape.

#### Queen Elizabeth Central Hospital, Blantyre, Malawi

The Queen Elizabeth Central Hospital is the tertiary public health facility for Blantyre, the major commercial centre of Malawi (MLW). The national incidence of TB in Malawi was 191 per 100,000 in 2011, with a national HIV prevalence of 11%.<sup>5</sup> Malaria and malnutrition are also endemic, and bacterial and helminth infections are common. Neonatal BCG vaccination coverage is estimated at 90%.<sup>5</sup>

#### Kilifi District Hospital & Coast Provincial General Hospital, Coast Province, Kenya

Coast Provincial General Hospital (CPGH) is the tertiary public health facility for Kenya's Coast Province. Situated in the port city of Mombasa, it is the second largest hospital in the country. Kilifi District Hospital (KDH) provides primary and secondary level care to Kilifi District, also in Coast Province. Both hospitals serve a mixed rural and urban population in an area where malaria<sup>6</sup> and malnutrition<sup>7</sup> are endemic, and invasive bacterial<sup>8</sup> and helminth infections<sup>6</sup> common. HIV prevalence among women attending antenatal services is 4.4%<sup>7</sup> and infant BCG vaccination coverage is estimated at 96%.<sup>7</sup>

### ***Patient screening and recruitment***

The process of patient screening and recruitment differed slightly between the study sites.

#### Discovery cohort

An operational approach to patient screening was instituted at the sites in South Africa and Malawi, whereby children were referred to the study team for investigation if the clinician looking after the child suspected a diagnosis of TB. All these children were eligible for inclusion in the study and further investigations and case management were as described in the main paper.

#### Validation cohort

Much broader screening criteria were used in the validation cohort as this formed part of a larger study of the epidemiology and diagnosis of pediatric tuberculosis. All children admitted to hospital were formally screened for a persistent cough for >2 weeks; pneumonia not responding to first line antibiotics; unexplained fever for >2 weeks; unexplained progressive weight loss or failure to thrive for >4 weeks; a history of close TB contact; and/or a doctor's clinical suspicion of TB for any other reason. Children with one or more of these features, plus those referred for outpatient investigation for TB and children <5 years old who were identified as household TB contacts of smear positive pulmonary TB, were then eligible for inclusion in the study. Further investigations and case management were as described in the main paper.

### ***Laboratory diagnosis***

Two spontaneous or induced sputum samples were examined by standard microscopy for acid-fast bacilli (AFB) and cultured for mycobacteria using the BD MGIT liquid culture technique. Isolation of MTB was confirmed by microscopic cording, MTB-64 lateral flow assays (Capilia®; TAUNS Laboratories, Inc., Numazu, Japan) and growth on p-nitrobenzoic acid (Malawi), plus specific PCR (SA and Kenya).

### ***RNA sample extraction and processing***

Whole blood (2.5ml) was collected into PAXgene™ blood RNA tubes (PreAnalytiX, Germany), incubated for 2 hours, frozen at -20°C within 6 hours of collection, and stored at -80°C. RNA was extracted using PAXgene™ blood RNA kits (PreAnalytiX, Germany) according to the manufacturer's instructions at one site (Cape Town for the discovery cohort or London for the Kenyan samples) to minimize sample handling bias. The integrity and yield of the total RNA was assessed using an Agilent 2100 Bioanalyser and a NanoDrop 1000 spectrophotometer. Total RNA was then shipped to the Genome Institute of Singapore. After quantification and

quality control, biotin-labeled cRNA was prepared using Illumina TotalPrep RNA Amplification kits (Applied Biosystems) from 500ng RNA. Labeled cRNA was hybridized overnight to Human HT-12 V4 Expression BeadChip arrays (Illumina). After washing, blocking and staining, the arrays were scanned using an Illumina BeadArray Reader according to the manufacturer's instructions. Using Genome Studio software the microarray images were inspected for artifacts and QC parameters were assessed. No arrays were excluded at this stage. Fourteen samples were excluded in total: 11 due to insufficient RNA after processing, 1 due to discrepant labeling, 2 removed at data QC in Principal Components Analysis (PCA).

### ***C-reactive protein measurements***

CRP was measured by ELISA (Invitrogen ELISA kit #KHA0031) on serum collected at the same time as blood for RNA expression.

## **Supplementary Statistical Methods**

### ***Microarray analysis***

Mean raw intensity values for each probe were corrected for local background intensities and a robust spline normalisation<sup>9</sup> (combining quantile normalisation and spline interpolation) was applied to each array. Expression values were transformed to a logarithmic scale (base 2). PCA was used as part of the quality control process of the arrays before the split into 80%-20% for the identification of signatures. PCA is an approach that allowed us to summarize our data and reduce the dimensionality (536 arrays x 48,000 probes, down to 536 arrays x no of principal components) in order to explore variance in the expression level.<sup>10</sup> RNA expression profiles of most children in the discovery cohort clustered together on PCA; two outlying samples were removed from the analysis (Figure S2). At the two first principal components there was no variance introduced because of location or HIV status of the samples (Figure S2). Using the 2-dimensional equivalent of the t-statistic, the Hotelling test<sup>11</sup>, we removed two samples before the analysis (categorized as TB/HIV+ and OD/HIV+ from Malawi). The samples were divided into a training set ( $n_{TB}=87$   $n_{OD}=134$  HIV+/-;  $n_{TB}=56$   $n_{OD}=82$  HIV-,  $n_{TB}=31$   $n_{OD}=52$  HIV+,  $n_{LTBI}=43$  HIV-) and test set ( $n_{TB}=23$   $n_{OD}=34$  HIV+/-;  $n_{TB}=14$   $n_{OD}=21$  HIV-,  $n_{TB}=9$   $n_{OD}=13$  HIV+,  $n_{LTBI}=11$  HIV-). Using the training set, we identified the transcripts that were differentially expressed between patient groups with  $|\log_2 FC| > 0.5$ , which were taken forward to variable selection with elastic net.<sup>12</sup> This threshold was chosen in order to ensure that differential expression for selected variables could be distinguished using the resolution of qPCR. The  $\alpha$  and  $\lambda$  parameters of elastic net, which control the

size of the selected model, were optimized via ten-fold cross-validation (CV). The weights assigned by elastic net to the trained model were used within a linear regression model to classify samples in the test set.

### ***Disease risk score***

For each individual, we calculated the disease risk score using the minimal transcript selected sets for TB vs. LTBI and TB vs. OD. The score is based on subtracting the summed intensities of the down-regulated transcripts from the summed intensities of the up-regulated transcripts. The disease risk score for individual  $i$  is:

$$Disease\ Risk\ Score^i = \sum_{k=0}^n expr.\ value_k^i - \sum_{l=0}^m expr.\ value_l^i \quad (1)$$

where:  $n$  the number of up-regulated number of probes in the signature in disease of interest (TB) compared to comparator group(s).

$m$  the number of down-regulated number of probes in the signature in disease of interest (TB) compared to comparator group(s).

The threshold for the classification was calculated as the weighted average of risk score within each class, with weights given as inverse of the standard deviation of the score within each class. The threshold for the classification between group  $u$  and  $v$  is shown below:

$$threshold(u, v) = \frac{\frac{\mu_u}{\sigma_u} + \frac{\mu_v}{\sigma_v}}{\frac{1}{\sigma_u} + \frac{1}{\sigma_v}} \quad (2)$$

where:  $\mu$  average of the disease risk score in the group.

$\sigma$  standard deviation of the disease risk score in the group.

### ***Analysis of validation dataset***

The microarray analysis for the Kenyan validation cohort was done as previously described, but the raw microarray data were pre-processed (background subtracted and normalized) separately from the discovery cohort. We then calculated the disease risk scores, based on the signatures derived in the discovery cohort, for the samples of the Kenyan cohort to evaluate their performance in an independent validation cohort.

In order to evaluate the IGRA+ OD patients who may have either self resolving primary TB or latent TB infection we performed the TB vs. OD comparison both with and without inclusion of the IGRA+ patients. There were 9 IGRA+ patients in the OD group randomly selected for array. The sensitivity of DRS for TB vs. OD remained unchanged with or without the IGRA+ patients, while specificity was 1% lower for when the IGRA+ patients were included. 7 of the 9 OD patients that were IGRA positive were classified as not TB by the DRS. As sensitivity of DRS was unchanged when IGRA positive patients were included or excluded, and to exclude possibility of including self resolving primary TB in the OD group, for calculation of performance of DRS in culture negative group we used only IGRA negative OD cases.

### ***Calculation of effective sensitivity in culture-negative TB groups***

In order to obtain more realistic estimates of the test sensitivity across the culture-negative TB categories, we recognized that each category is a mixture of “actual” TB cases and OD clinically confused with TB. We therefore, modeled the observed true-positive rate (TPR) as a function of the unknown actual TPR, the false-positive rate (FPR) estimated from the OD group, and the prevalence of TB (Supplementary Methods Eq. 3), from which we calculated a corrected Receiver Operator Characteristic (ROC) curve and estimates of 'effective' sensitivity in each category. As the prevalence of TB in each category is unknown, we investigated a range of prevalence of 70%-90%, 40%-60% and 30%-50% for “highly probable”, “probable” and “possible” TB respectively and also present unadjusted results which are equivalent to assuming a TB prevalence of 100% in each category.

Application of a classifier, such as DRS, to the culture-negative TB group results in an observed estimate of the true-positive rate ( $TPR_{obs}$ ), which is the proportion of all observed culture-negative TB cases ( $P_{obs}$ ) scored as 'positive' by the classifier. However, these observed positives are in fact a mixture of actual true TB and false TB (i.e. OD), hence



$$\begin{aligned}
TPR_{obs} &= \frac{TP_{obs}}{P_{obs}} = \frac{TP_{actual} + FP_{actual}}{P_{actual} + F_{actual}} = \frac{TPR_{effective} * P_{actual} + FPR_{effective} * F_{actual}}{P_{actual} + F_{actual}} \\
&= TPR_{effective} * \frac{P_{actual}}{P_{actual} + F_{actual}} + FPR_{effective} * \frac{F_{actual}}{P_{actual} + F_{actual}} \\
&= TPR_{effective} * \Pr(TB) + FPR_{effective} * (1 - \Pr(TB)) \quad (3)
\end{aligned}$$

where:  $F_{actual}$  is the number of OD and  $\Pr(TB)$  is the prevalence of true TB and in the group under consideration.  $FPR_{effective}$  is the false-positive rate, estimated as the proportion of OD cases that are falsely called TB by the classifier. We can re-arrange equation (3) to obtain a formula for the effective TPR in terms of the group prevalence and the FPR estimated from the OD group:

$$TPR_{effective} = \frac{TPR_{obs} - FPR_{actual} * (1 - \Pr(TB))}{\Pr(TB)} \quad (4)$$

### **Positive and negative predictive value for combined culture positive and culture negative TB**

We calculated the positive and negative predictive value (PPV and NPV) as a function of specificity sensitivity and prevalence according to the following formulae:

$$NPV = \frac{specificity * (1 - prevalence)}{specificity * (1 - prevalence) + (1 - sensitivity) * prevalence} \quad (5)$$

$$PPV = \frac{sensitivity * prevalence}{sensitivity * prevalence + (1 - sensitivity) * (1 - prevalence)} \quad (6)$$

Given the dependency of NPV/PPV on test sensitivity, specificity and prevalence, it is important to provide estimates of these values specific to scenarios in which such a diagnostic test would be applied. We have calculated these values for a scenario in which a child presents to a clinic with symptoms consistent with TB, and thus we use the specificity as reported in Table 2 for the HIV-infected and -uninfected combined other disease group from the Kenyan validation set.

We use a test sensitivity estimate derived on the combined culture-positive and culture-negative TB groups. We estimated this as a weighted average of the 'effective' sensitivity in the culture-confirmed, "highly probable" (HP), "probable" (Pr) and "possible" (Pos) TB, with the weights given by the proportion of samples in the Kenyan prospective study which were assigned to each of these groups. The effective sensitivity in each

subgroup was calculated using equation 4, based on the same range of assumptions on the prevalence of 'actual' TB in each group used to calculate effective sensitivities in Table S7. In more detail, the scenarios considered are:

- A: TB prevalence in: culture confirmed = 100%; HP TB = 70%; Pr TB =40%; Pos TB = 30%
- B: TB prevalence in: culture confirmed = 100%; HP TB = 80%; Pr TB =50%; Pos TB = 40%
- C: TB prevalence in: culture confirmed = 100%; HP TB = 90%; Pr TB =60%; Pos TB = 50%

Also recognizing that the prevalence of TB among the population tested will depend on the operational clinical strategy for TB screening, we used a range of estimates for TB population prevalence in the patients screened (10%, 30% and 50%).

- 10%: reflects the prevalence of TB in the Kenyan cohort
- 30%: reflects the prevalence of TB in the South Africa and Malawi recruitment
- 50%: reflects a scenario that clinicians would do prior filtering or combining with another test

The proportion of proven TB amongst patients suspected of having TB varies depending on the strategy for TB investigation. In South Africa and Malawi, patients were investigated for TB if the clinicians responsible for the child's care considered TB to be included in the differential diagnosis. In Kenya, a systematic screening process was undertaken for all children with cough, fever or weight loss of > 2 weeks duration. The difference in approach resulted in different proportions of TB cases, with the broad criteria used in Kenya being reflected in a lower proportion of TB. As our research setting actively sought to identify TB cases, it is likely that in a non-research setting in typical African hospitals, patients selected to undergo investigation for TB may make up a higher proportion of those investigated, hence our exploration of 50% prevalence scenario.

## Supplementary Figures

**Figure S1a. Recruitment at Red Cross War Memorial Children's Hospital, Cape Town, SA.**

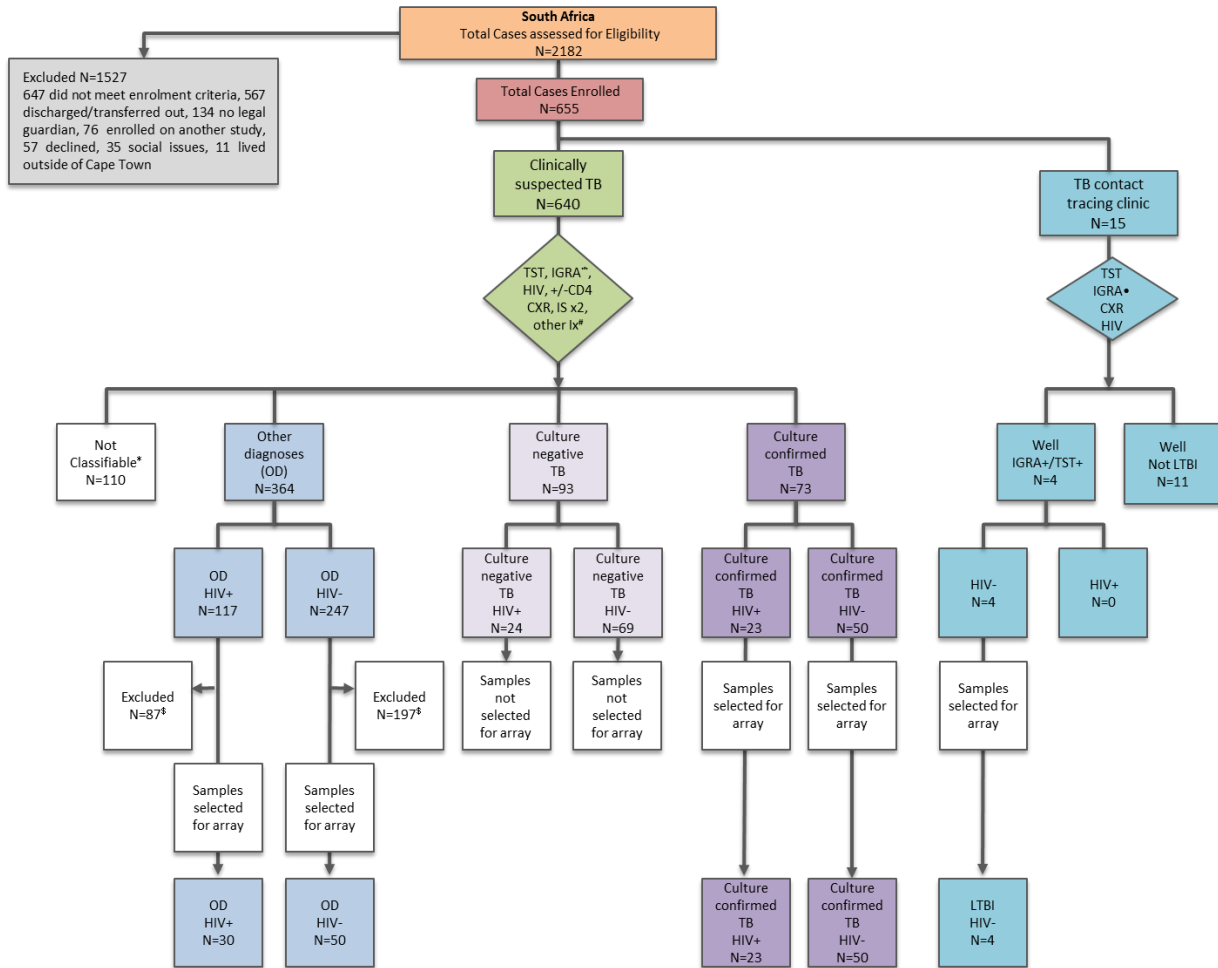

\*IGRA performed at baseline and 3 months in the OD category & at baseline and where possible 3 months in the TB cases category.

‡investigations done at attending clinician's discretion to diagnose OD's (urine, cerebrospinal fluid, blood cultures) as well as additional investigations performed to diagnose TB (ultrasound scans, CT-scans, histology and cytology).

•IGRA performed at baseline and at 3 months.

\*cases excluded due to inconclusive/inadequate investigations at baseline.

§cases excluded due to inconclusive diagnoses/patients lost to follow-up.

Among HIV-uninfected and -infected definite TB cases, 76.0% and 56.5% of samples respectively were smear negative on microscopy.

**Figure S1b. Recruitment at Queen Elizabeth Central Hospital, Blantyre, Malawi.**

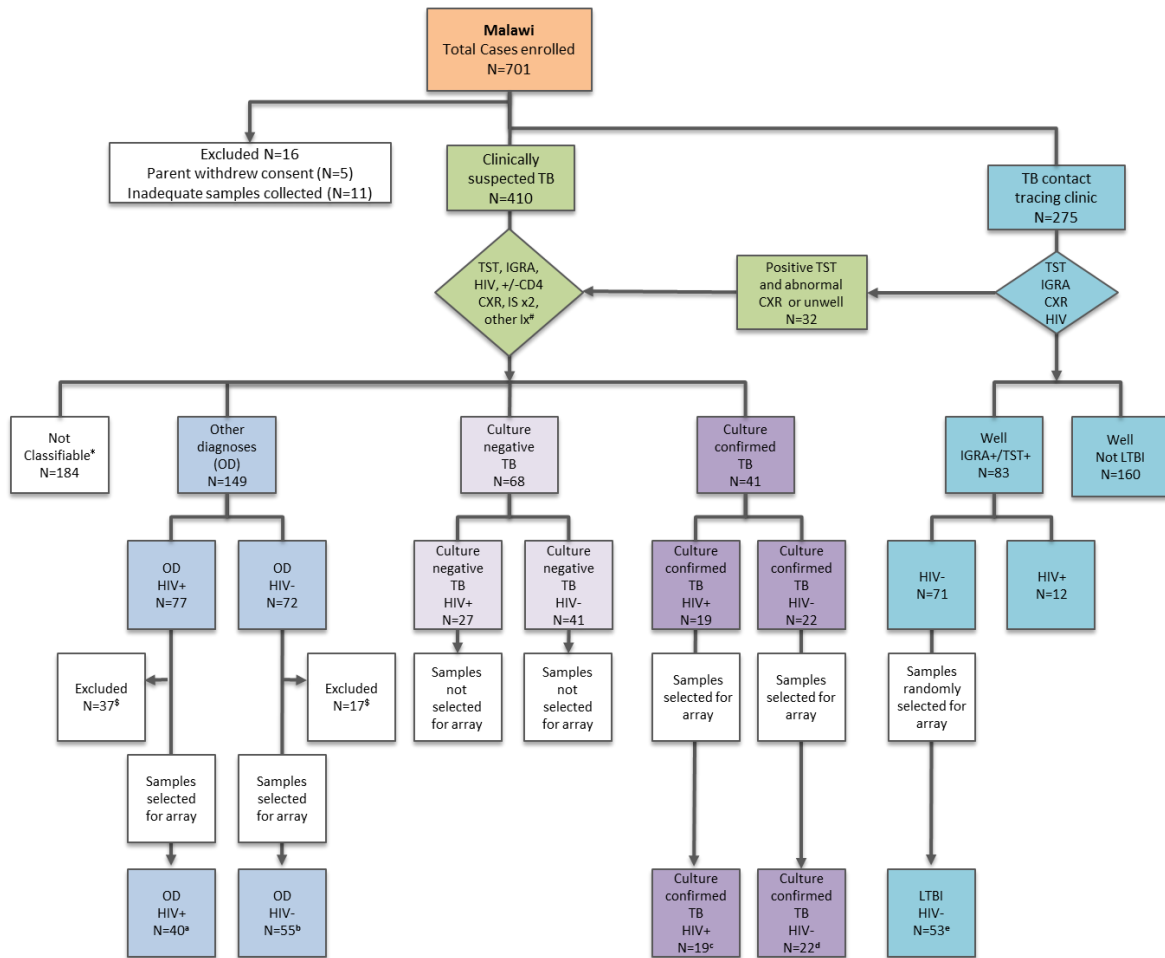

<sup>#</sup>Investigations done at attending clinicians discretion to diagnose ODs (urine, CSF, blood cultures, histology, malaria thick film); additional investigations performed to diagnose TB (ultrasound scans, MRI-scans, TB blood culture, histology).

\*Cases excluded due to inconclusive/inadequate investigations at baseline.

§Samples excluded because of inconclusive diagnoses.

<sup>a,b,c,d,e</sup> 4, 2, 1, 2, 3 samples respectively lost during sample processing.

Among HIV-uninfected and -infected definite TB cases, 50% and 54% of samples respectively were smear negative on microscopy.

**Figure S1c. Recruitment of validation cohort at Kilifi District Hospital & Coast Provincial General Hospital, Coast Province, Kenya.**

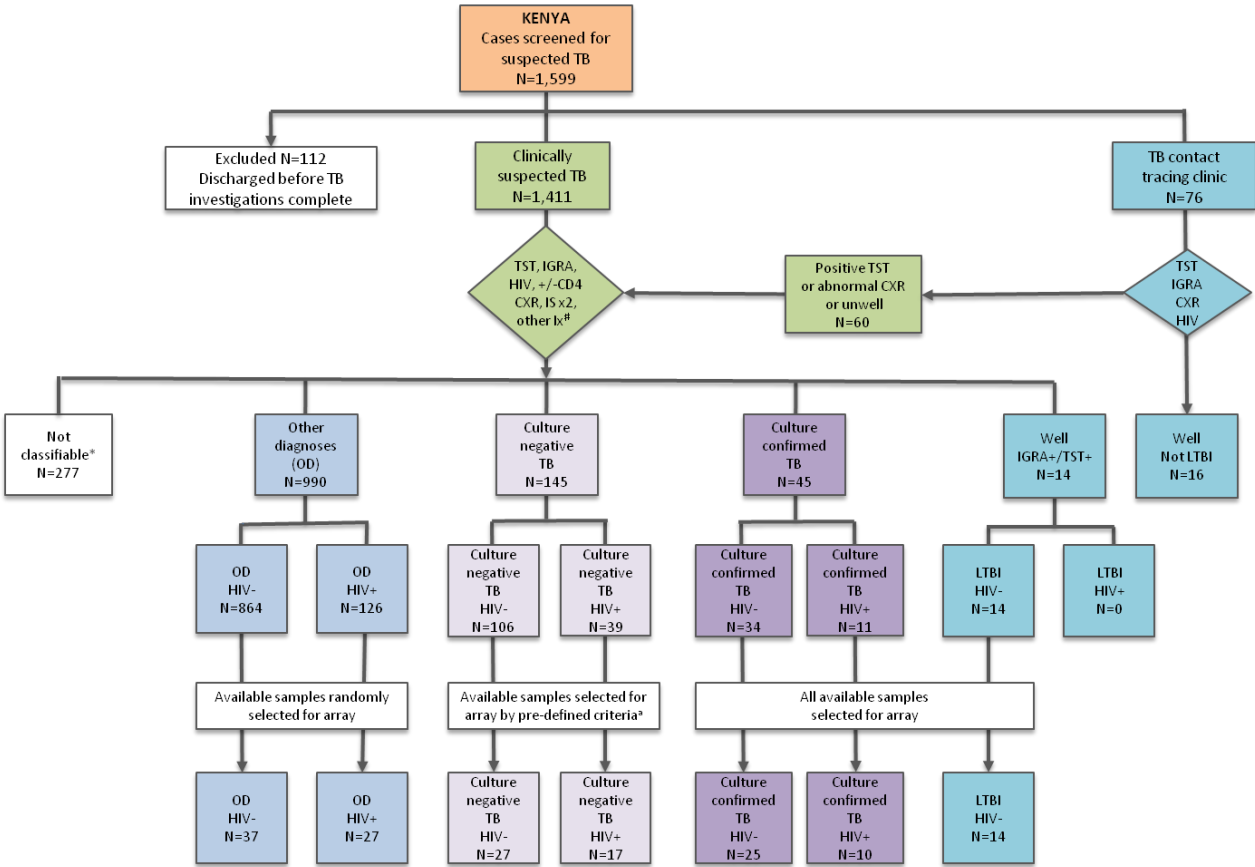

# Additional investigations done at the attending clinician’s discretion to aid diagnosis of TB or ODs included: thick and thin films for malaria; blood cultures; urine cultures; CSF microscopy, culture, bacterial antigen tests and biochemistry; culture of pleural, peritoneal, joint and abscess fluid; bone marrow biopsy; radiological imaging including ultrasound and computed tomography scans; and tissue biopsy for histology and culture).

\*Cases that were not classifiable were those not treated for TB in whom TB could be neither diagnosed nor excluded with confidence due to death or loss to follow up.

<sup>a</sup> see methods.

**Figure S2. Principal components analysis of the microarrayed samples in the discovery cohort (South Africa and Malawi).**

Principal components analysis (PCA) plot of PCA1 & PCA2 based on all genes on all of the samples after background adjustment and normalisation. Two samples indicated by the arrows (a TB/HIV+ and an OD/HIV+ case from Malawi) were removed from the analysis. Confidence ellipses calculated for the population mean are shown below (0.999 inner circle, 0.9999 outer circle).

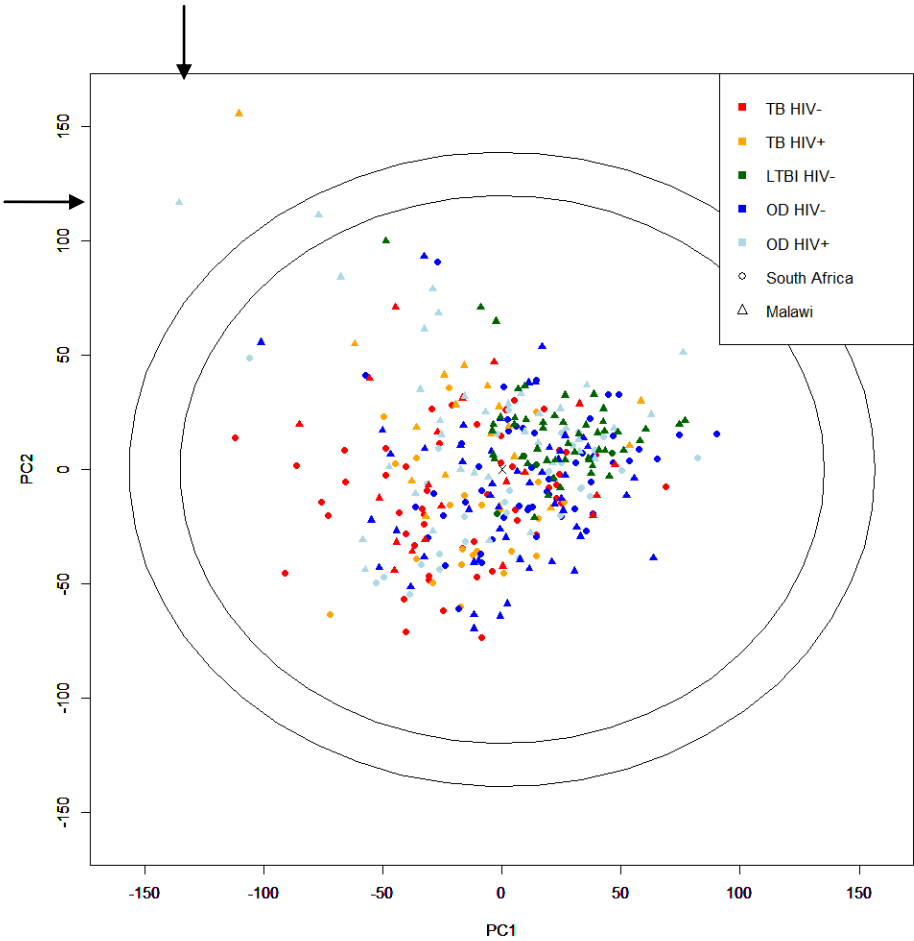

**Figure S3. Disease risk scores and Receiver Operator Characteristic curves based on the TB/OD 51-transcript signature applied to the South African (SA)/Malawi HIV+/- test set and the Kenyan validation cohort.**

Sensitivity, specificity are reported in Table 2. Test set: nTB=23 nOD=34; Validation cohort: nTB=35, nOD=55; Validation cohort including IGRA+ patients: nTB=35, nOD=64. 7 out of the 9 IGRA+ OD patients are classified as OD and 2 as TB (red arrows) using the DRS.

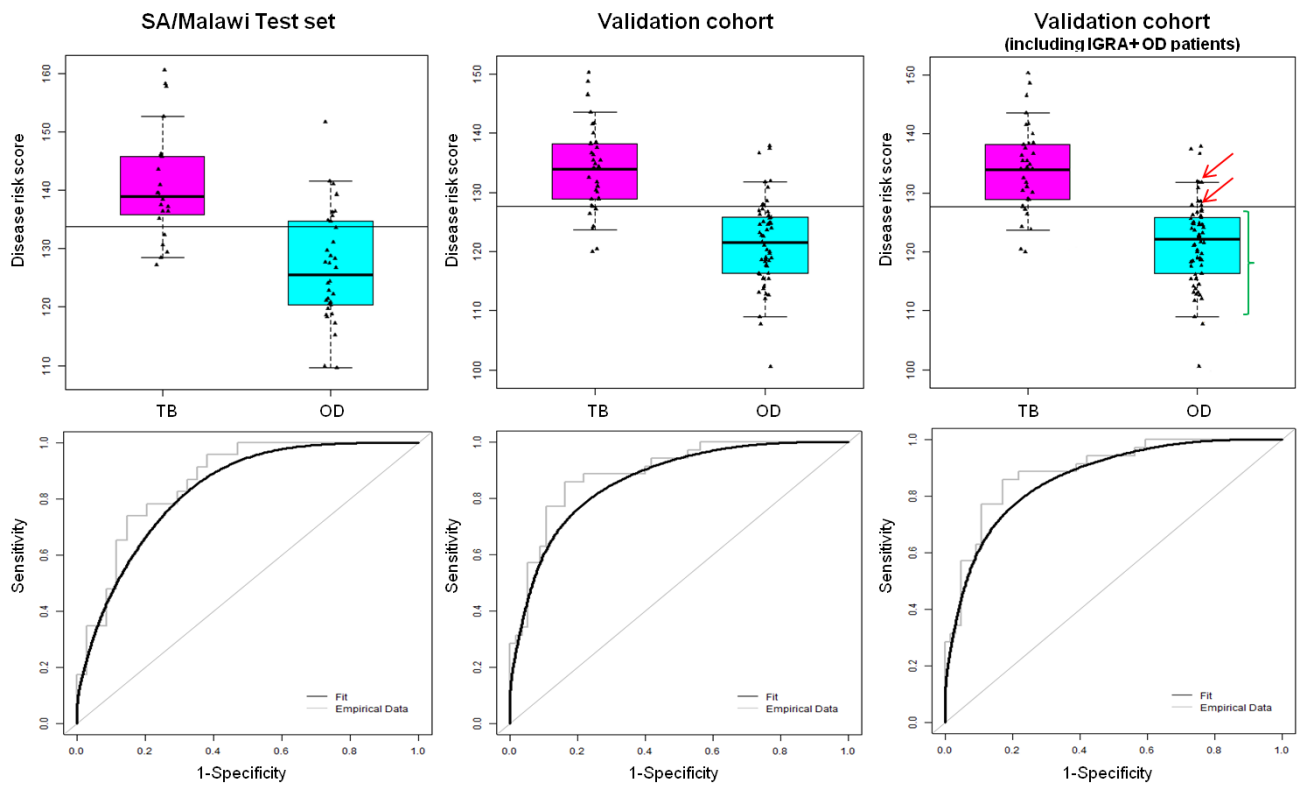

**Figure S4. Disease risk scores and Receiver Operator Characteristic curves based on the TB/LTBI 42-transcript signature applied to the South African (SA)/Malawi HIV+/- test set and the Kenyan validation cohort.**

Sensitivity, specificity are reported in Table S3. Test set: nTB=23 nLTBI=11; Validation cohort: nTB=35, nLTBI=14.

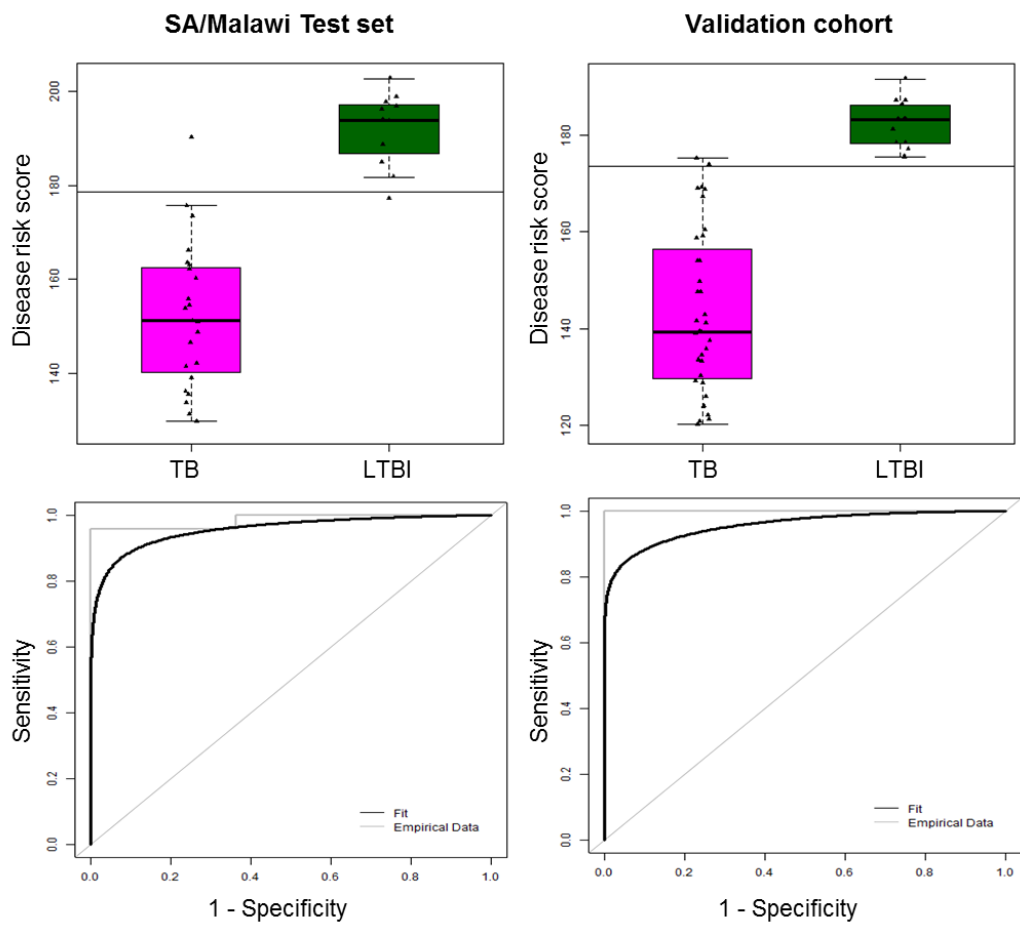



**Figure S5. Disease risk scores and Receiver Operator Characteristic curves based on the TB/OD 51-transcript signature applied to the Kenyan cohort by HIV status.**

Sensitivity, specificity are reported in Table S6. Validation cohort: nTB=25 nOD= 29 HIV-uninfected, nTB=10 nOD=26 HIV-infected.

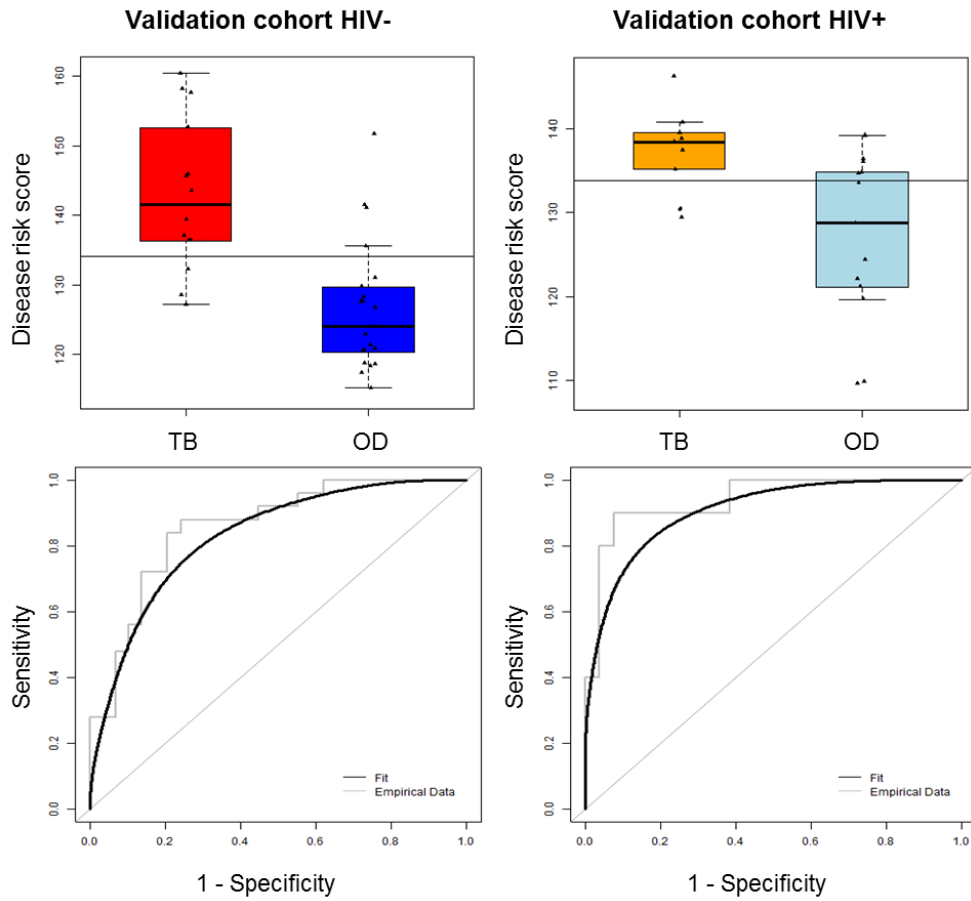

**Figure S6. Serum CRP measurements from the patients which have been included in the gene expression analysis from the Kenyan validation cohort (44 culture negative TB, 52 other diseases and 34 culture positive TB).**

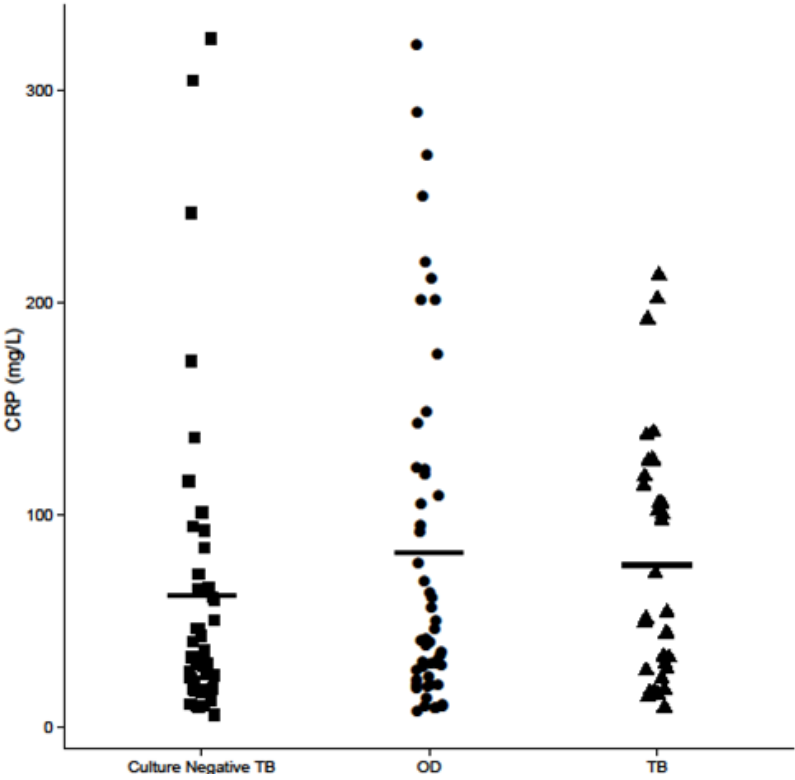

Supplementary Tables

**Table S1a. Clinical features of children in the South Africa/Malawi discovery cohort.**

|                                              | TB / HIV-            |                      | TB / HIV <sup>+</sup> |                      | LTBI / HIV-          |                     | OD / HIV <sup>+</sup> |                      | OD / HIV-            |                      |
|----------------------------------------------|----------------------|----------------------|-----------------------|----------------------|----------------------|---------------------|-----------------------|----------------------|----------------------|----------------------|
|                                              | SA                   | Malawi               | SA                    | Malawi               | SA                   | Malawi              | SA                    | Malawi               | SA                   | Malawi               |
| <b>Location</b>                              | SA                   | Malawi               | SA                    | Malawi               | SA                   | Malawi              | SA                    | Malawi               | SA                   | Malawi               |
| <b>No. children</b>                          | 50                   | 22                   | 23                    | 19                   | 4                    | 53                  | 30                    | 40                   | 50                   | 55                   |
| <b>Median age, months (IQR)</b>              | 29<br>(15; 96)       | 99<br>(55; 134)      | 62<br>(43; 102)       | 89<br>(51; 130)      | 35<br>(29; 50)       | 48<br>(23; 91)      | 23<br>(13; 66)        | 97<br>(51; 156)      | 15<br>(11; 25)       | 47<br>(20; 104)      |
| <b>Male (%)</b>                              | 62                   | 55                   | 65                    | 58                   | 50                   | 53                  | 50                    | 49                   | 64                   | 62                   |
| <b>Median WAZ score (IQR)</b>                | -1.5<br>(-2.3; -0.4) | -2.7<br>(-3.4; -0.9) | -1.78<br>(-2.5; -1.1) | -2.9<br>(-3.2; -2.3) | -0.62<br>(-1.8; 0.4) | -1.1<br>(-2.1; 0.0) | -1.2<br>(-3.0; -0.6)  | -2.2<br>(-2.8; -1.7) | -1.2<br>(-1.9; -0.0) | -1.1<br>(-2.2; -0.5) |
| <b>BCG vaccinated (%)</b>                    | 42/45<br>(93%)       | 19/19<br>(100%)      | 17/18<br>(94%)        | 17/17<br>(100%)      | 4/4<br>(100%)        | 51/51<br>(100%)     | 25/25<br>(100%)       | 34/34<br>(100%)      | 47/48<br>(97.92)     | 52/53<br>(98%)       |
| <b>Median CD4 count/mm<sup>3</sup> (IQR)</b> | NA                   | NA                   | 640<br>(169; 812)     | 418<br>(278; 762)    | NA                   | NA                  | 531<br>(315; 805)     | 349<br>(141; 611)    | NA                   | NA                   |
| <b>Median % CD4 count (IQR)</b>              | NA                   | NA                   | 18.7<br>(12.6; 26.3)  | ND                   | NA                   | NA                  | 20.9<br>(11.6; 22.4)  | ND                   | NA                   | NA                   |
| <b>TST positive*</b>                         | 38/50<br>(76%)       | 16/22<br>(73%)       | 10/20<br>(50%)        | 7/19<br>(37%)        | 4/4<br>(100%)        | 53/53<br>(100%)     | 0/30<br>(0%)          | 0/40<br>(0%)         | 0/50<br>(0%)         | 0/50<br>(0%)         |
| <b>IGRA positive</b>                         | 39/50<br>(78%)       | 18/22<br>(82%)       | 17/22<br>(77%)        | 13/19<br>(68%)       | 4/4<br>(100%)        | 53/53<br>(100%)     | 0/30<br>(0%)          | 0/40<br>(0%)         | 0/50<br>(0%)         | 0/50<br>(0%)         |

SA = South Africa, TB = active TB, LTBI = latent TB infection, OD = other diseases (see below), HIV- = HIV-uninfected, HIV+ = HIV-infected, IQR= interquartile range, WAZ = weight-for-age z-score, TST = tuberculin skin test, IGRA= interferon gamma release assay, ND= not done, NA= not applicable.

<sup>†</sup>12 of the HIV+ children in Malawi were on ART and 0 of the children from South Africa.

\*A positive TST was defined according to WHO guidelines as an induration of  $\geq 10\text{mm}$ ; or  $\geq 5\text{mm}$  in children with HIV infection or severe malnutrition with 2 TU of PPD RT23 (SSI, Denmark).

Discrepancies in total number of children in each category and number with a visible BCG scar denote cases in whom it was difficult to determine whether a scar was present.

**Table S1b. Major clinical diagnoses in the 'Other Diseases' groups from each study site.**

| Group<br>Location                                     | HIV-infected |        |       | HIV-uninfected |        |       | Total |
|-------------------------------------------------------|--------------|--------|-------|----------------|--------|-------|-------|
|                                                       | SA           | Malawi | Kenya | SA             | Malawi | Kenya |       |
| Pneumonia <sup>a</sup>                                | 24           | 15     | 15    | 30             | 17     | 18    | 119   |
| Bronchiectasis/chronic lung disease                   | 2            | 7      | -     | -              | 1      | -     | 10    |
| Lymphocytic Interstitial Pneumonitis                  | -            | 2      | -     | -              | -      | -     | 2     |
| Upper respiratory tract infection (URTI)              | -            | -      | -     | 11             | -      | -     | 11    |
| Inflammatory bone and joint diseases                  | -            | 1      | -     | -              | 8      | 2     | 11    |
| Bacterial soft tissue infection                       | -            | 5      | -     | -              | 16     | -     | 21    |
| Gastroenteritis                                       | 2            | -      | -     | 5              | -      | -     | 7     |
| Infection at ≥2 sites <sup>b</sup>                    | 2            | -      | -     | 3              | -      | -     | 5     |
| Sepsis without a focus <sup>c</sup>                   | -            | -      | 4     | -              | -      | 1     | 5     |
| Kaposi Sarcoma <sup>d</sup>                           | -            | 7      | -     | -              | -      | -     | 7     |
| Other malignancy <sup>e</sup>                         | -            | -      | -     | -              | 5      | 1     | 6     |
| Malaria + severe malnutrition                         | -            | -      | -     | -              | 1      | 3     | 4     |
| Primary diagnosis of severe malnutrition <sup>f</sup> | -            | 1      | 4     | -              | 1      | 3     | 9     |
| Other <sup>g</sup>                                    | -            | 2      | 3     | 1              | 6      | 1     | 13    |

<sup>a</sup> Includes 10 with pneumonia and bacteremia; one of whom also had empyema.

<sup>b</sup> Includes pneumonia and gastroenteritis (2); pneumonia and urinary tract infection and gastroenteritis (1) bacterial meningitis and URTI (1); gastroenteritis and URTI (1).

<sup>c</sup> Includes 3 children with bacteraemia, one child with bacteraemia and malaria, and one child with malaria and septic shock.

<sup>d</sup> Includes one child with Kaposi Sarcoma and septicemia.

<sup>e</sup> All histologically confirmed - Burkitt's lymphoma (3); rhabdomyosarcoma (1); non-Hodgkin's lymphoma (1); and metastatic carcinoma of uncertain origin (1).

<sup>f</sup> These are children who had a primary diagnosis of severe malnutrition; many other children in the OD group also had severe malnutrition in addition to the diagnoses listed.

<sup>g</sup> Includes cryptococcal meningitis (2); empyema (3); NTS septicaemia (2); congenital spinal abnormalities (2); abscess + bacteremia (1); bacterial meningitis (1); severe anemia (1); and one child with severe malnutrition and a febrile illness of uncertain etiology which resolved without TB treatment.

**Table S2a. 42-transcript signature for distinguishing TB from latent TB infection.**

| Array ID        | ILMN Gene    | Transcript         | Direction <sup>§</sup> | Description                                                                                                                                                     |
|-----------------|--------------|--------------------|------------------------|-----------------------------------------------------------------------------------------------------------------------------------------------------------------|
| 6480059*        | ACTA2*       | ILMN_6588*         | UP                     | actin, alpha 2, smooth muscle, aorta (ACTA2), mRNA.                                                                                                             |
| 3310324         | ALKBH7       | ILMN_7229          | DOWN                   | alkB, alkylation repair homolog 7 (E. coli) (ALKBH7), mRNA.                                                                                                     |
| 5550397*        | APOL6*       | ILMN_38312*        | UP                     | apolipoprotein L, 6 (APOL6), mRNA.                                                                                                                              |
| 7400341         | C11ORF2      | ILMN_10940         | DOWN                   | chromosome 11 open reading frame 2 (C11orf2), mRNA.                                                                                                             |
| 1500546         | C20ORF201    | ILMN_25727         | DOWN                   | chromosome 20 open reading frame 201 (C20orf201), mRNA.                                                                                                         |
| 6380187         | C21ORF57     | ILMN_21121         | DOWN                   | chromosome 21 open reading frame 57 (C21orf57), transcript variant 1, mRNA.                                                                                     |
| 1470706         | C8ORF55      | ILMN_25304         | DOWN                   | chromosome 8 open reading frame 55 (C8orf55), mRNA.                                                                                                             |
| 2030170*        | CARD16*      | ILMN_21555*        | UP                     | caspase recruitment domain family, member 16 (CARD16), transcript variant 2, mRNA.                                                                              |
| 6110427         | CLIP1        | ILMN_15054         | UP                     | CAP-GLY domain containing linker protein 1 (CLIP1), transcript variant 1, mRNA.                                                                                 |
| 5340246         | CRIP2        | ILMN_29728         | DOWN                   | cysteine-rich protein 2 (CRIP2), mRNA.                                                                                                                          |
| <b>4540239</b>  | <b>DEFA1</b> | <b>ILMN_29692</b>  | <b>UP</b>              | <b>defensin, alpha 1 (DEFA1), mRNA.</b>                                                                                                                         |
| 4860128         | DEFA1B       | ILMN_176067        | UP                     | defensin, alpha 1B (DEFA1B), mRNA.                                                                                                                              |
| 2970747         | DEFA3        | ILMN_11220         | UP                     | defensin, alpha 3, neutrophil-specific (DEFA3), mRNA.                                                                                                           |
| 7200274         | DGCR6        | ILMN_138781        | DOWN                   | DiGeorge syndrome critical region gene 6 (DGCR6), mRNA.                                                                                                         |
| 3440647         | DNAJC30      | ILMN_30295         | DOWN                   | DnaJ (Hsp40) homolog, subfamily C, member 30 (DNAJC30), mRNA.                                                                                                   |
| 3390068         | E4F1         | ILMN_23848         | DOWN                   | E4F transcription factor 1 (E4F1), mRNA.                                                                                                                        |
| 4670441         | FBLN5        | ILMN_29187         | DOWN                   | fibulin 5 (FBLN5), mRNA.                                                                                                                                        |
| <b>1510364*</b> | <b>GBP5*</b> | <b>ILMN_24462*</b> | <b>UP</b>              | <b>guanylate binding protein 5 (GBP5), mRNA.</b>                                                                                                                |
| <b>3780047*</b> | <b>GBP6*</b> | <b>ILMN_1956*</b>  | <b>UP</b>              | <b>guanylate binding protein family, member 6 (GBP6), mRNA.</b>                                                                                                 |
| 450632          | GNG3         | ILMN_7558          | DOWN                   | guanine nucleotide binding protein (G protein), gamma 3 (GNG3), mRNA.                                                                                           |
| 1500575         | HS.538100    | ILMN_103699        | DOWN                   | xn24e12.x1 NCI_CGAP_Kid11 cDNA clone IMAGE:2694670 3, mRNA sequence                                                                                             |
| 4590026         | IMPDH2       | ILMN_3439          | DOWN                   | IMP (inosine monophosphate) dehydrogenase 2 (IMPDH2), mRNA.                                                                                                     |
| 7330575         | KLHL28       | ILMN_22112         | DOWN                   | kelch-like 28 (Drosophila) (KLHL28), mRNA.                                                                                                                      |
| 2810669         | LCMT1        | ILMN_16696         | DOWN                   | leucine carboxyl methyltransferase 1 (LCMT1), transcript variant 1, mRNA.                                                                                       |
| 5340414         | LGTN         | ILMN_4831          | DOWN                   | ligatin (LGTN), mRNA.                                                                                                                                           |
| 2140541         | LOC389816    | ILMN_182870        | DOWN                   | cytokeratin associated protein (LOC389816), mRNA.                                                                                                               |
| 620403          | LOC400759    | ILMN_181219        | UP                     | similar to Interferon-induced guanylate-binding protein 1 (GTP-binding protein 1) (Guanine nucleotide-binding protein 1) (HuGBP-1) (LOC400759) on chromosome 1. |
| 2230538         | LRRN3        | ILMN_306943        | DOWN                   | leucine rich repeat neuronal 3 (LRRN3), transcript variant 1, mRNA.                                                                                             |
| 5560075         | MFGE8        | ILMN_11368         | DOWN                   | milk fat globule-EGF factor 8 protein (MFGE8), mRNA.                                                                                                            |
| 4210411*        | NDRG2*       | ILMN_19545*        | DOWN                   | NDRG family member 2 (NDRG2), transcript variant 6, mRNA.                                                                                                       |
| 6450424         | NME3         | ILMN_23571         | DOWN                   | non-metastatic cells 3, protein expressed in (NME3), mRNA.                                                                                                      |
| 6770603         | NOG          | ILMN_7080          | DOWN                   | noggin (NOG), mRNA.                                                                                                                                             |
| 4150017         | PAQR7        | ILMN_3765          | DOWN                   | progesterone and adipoQ receptor family member VII (PAQR7), mRNA.                                                                                               |

|          |         |             |      |                                                                                                     |
|----------|---------|-------------|------|-----------------------------------------------------------------------------------------------------|
| 2140382* | PASK*   | ILMN_19873* | DOWN | PAS domain containing serine/threonine kinase (PASK), mRNA.                                         |
| 4150100* | PASK*   | ILMN_19873* | DOWN | PAS domain containing serine/threonine kinase (PASK), mRNA.                                         |
| 7150189  | PHF17   | ILMN_1535   | DOWN | PHD finger protein 17 (PHF17), transcript variant S, mRNA.                                          |
| 3400468  | RAP1A   | ILMN_20446  | UP   | RAP1A, member of RAS oncogene family (RAP1A), transcript variant 1, mRNA.                           |
| 4670487  | SIVA    | ILMN_6846   | DOWN | CD27-binding (Siva) protein (SIVA), transcript variant 2, mRNA.                                     |
| 6280433  | SNHG7   | ILMN_371358 | DOWN | small nucleolar RNA host gene 7 (non-protein coding) (SNHG7), transcript variant 1, non-coding RNA. |
| 4260189  | TGIF1   | ILMN_162784 | DOWN | TGFB-induced factor homeobox 1 (TGIF1), transcript variant 1, mRNA.                                 |
| 4050059  | U2AF1L4 | ILMN_8757   | DOWN | U2 small nuclear RNA auxiliary factor 1-like 4 (U2AF1L4), transcript variant 2, mRNA.               |
| 6550358  | UBA52   | ILMN_27795  | DOWN | ubiquitin A-52 residue ribosomal protein fusion product 1 (UBA52), transcript variant 2, mRNA.      |

§ in TB patients in relation to patients with latent TB infection. 3 probes are also in the TB/OD signature (in bold), 8 probes overlap with the Berry *et al.* 393 probe adult signature (\*)

**Table S2b. 51-transcript signature for distinguishing TB from other diseases.**

| Array ID       | ILMN Gene    | Transcript        | Direction <sup>§</sup> | Description                                                                                                             |
|----------------|--------------|-------------------|------------------------|-------------------------------------------------------------------------------------------------------------------------|
| 4180768        | ALAS2        | ILMN_13644        | UP                     | aminolevulinatase, delta-, synthase 2 (ALAS2), nuclear gene encoding mitochondrial protein, transcript variant 3, mRNA. |
| 1070477        | ALDH1A1      | ILMN_177898       | UP                     | aldehyde dehydrogenase 1 family, member A1 (ALDH1A1), mRNA.                                                             |
| 5910019        | C1QB         | ILMN_36274        | UP                     | complement component 1, q subcomponent, B chain (C1QB), mRNA.                                                           |
| 4290026        | C20ORF103    | ILMN_165304       | DOWN                   | chromosome 20 open reading frame 103 (C20orf103), mRNA.                                                                 |
| 2600634        | C3HC4        | ILMN_6980         | DOWN                   | membrane-associated ring finger (C3HC4) 8 (MARCH8), transcript variant 6, mRNA.                                         |
| 1580048        | CAST         | ILMN_163108       | UP                     | calpastatin (CAST), transcript variant 9, mRNA.                                                                         |
| 3390564        | CCDC52       | ILMN_23129        | UP                     | coiled-coil domain containing 52 (CCDC52), mRNA.                                                                        |
| 3940754        | CD226        | ILMN_3877         | UP                     | CD226 molecule (CD226), mRNA.                                                                                           |
| 1780440        | CD79A        | ILMN_37614        | UP                     | CD79a molecule, immunoglobulin-associated alpha (CD79A), transcript variant 1, mRNA.                                    |
| 5890653        | CDKN1C       | ILMN_20689        | DOWN                   | cyclin-dependent kinase inhibitor 1C (p57, Kip2) (CDKN1C), mRNA.                                                        |
| 5340767        | CEACAM1      | ILMN_21651        | DOWN                   | carcinoembryonic antigen-related cell adhesion molecule 1 (biliary glycoprotein) (CEACAM1), transcript variant 1, mRNA. |
| 130086         | CYB561       | ILMN_8373         | UP                     | cytochrome b-561 (CYB561), transcript variant 1, mRNA.                                                                  |
| 840446         | CYB561       | ILMN_20474        | UP                     | cytochrome b-561 (CYB561), transcript variant 3, mRNA.                                                                  |
| <b>4540239</b> | <b>DEFA1</b> | <b>ILMN_29692</b> | <b>UP</b>              | <b>defensin, alpha 1 (DEFA1), mRNA.</b>                                                                                 |
| 1050068        | F2RL1        | ILMN_176188       | UP                     | coagulation factor II (thrombin) receptor-like 1 (F2RL1), mRNA.                                                         |
| 6510707        | FER1L3       | ILMN_18562        | UP                     | fer-1-like 3, myoferlin (C. elegans) (FER1L3), transcript variant 1, mRNA.                                              |
| 6840767        | FRMD3        | ILMN_11826        | DOWN                   | FERM domain containing 3 (FRMD3), mRNA.                                                                                 |
| 2350189        | GBP3         | ILMN_3653         | UP                     | guanylate binding protein 3 (GBP3), mRNA.                                                                               |
| <b>1510364</b> | <b>GBP5</b>  | <b>ILMN_24462</b> | <b>UP</b>              | <b>guanylate binding protein 5 (GBP5), mRNA.</b>                                                                        |
| <b>3780047</b> | <b>GBP6</b>  | <b>ILMN_1956</b>  | <b>UP</b>              | <b>guanylate binding protein family, member 6 (GBP6), mRNA.</b>                                                         |
| 6220739        | GRAMD1B      | ILMN_308544       | DOWN                   | GRAM domain containing 1B (GRAMD1B), mRNA.                                                                              |
| 5260484        | HLA-DRB1     | ILMN_20550        | UP                     | major histocompatibility complex, class II, DR beta 1 (HLA-DRB1), mRNA.                                                 |
| 6370315        | HLA-DRB5     | ILMN_3178         | UP                     | major histocompatibility complex, class II, DR beta 5 (HLA-DRB5), mRNA.                                                 |
| 620544         | HLA-DRB6     | ILMN_5312         | UP                     | major histocompatibility complex, class II, DR beta 6 (pseudogene) (HLA-DRB6), non-coding RNA.                          |
| 630619         | HPSE         | ILMN_165418       | DOWN                   | heparanase (HPSE), mRNA.                                                                                                |
| 5340762        | HS.106234    | ILMN_74965        | UP                     | cDNA FLJ37173 fis, clone BRACE2028392                                                                                   |
| 7320678        | HS.171481    | ILMN_80341        | UP                     | hx21e11.y1 Human primary human ocular pericytes. Equalized (hx) Homo sapiens cDNA clone hx21e11 5, mRNA sequence        |
| 4880370        | JUP          | ILMN_3789         | DOWN                   | junction plakoglobin (JUP), transcript variant 1, mRNA.                                                                 |
| 1050215        | KCNJ15       | ILMN_164363       | DOWN                   | potassium inwardly-rectifying channel, subfamily J, member 15 (KCNJ15), transcript variant 1, mRNA.                     |
| 2570438        | KIFC3        | ILMN_4695         | UP                     | kinesin family member C3 (KIFC3), mRNA.                                                                                 |
| 7560114        | KLHDC8B      | ILMN_6513         | UP                     | kelch domain containing 8B (KLHDC8B), mRNA.                                                                             |



|         |           |             |      |                                                                                                                                          |
|---------|-----------|-------------|------|------------------------------------------------------------------------------------------------------------------------------------------|
| 5310445 | KREMEN1   | ILMN_41914  | DOWN | kringle containing transmembrane protein 1 (KREMEN1), transcript variant 4, mRNA.                                                        |
| 4570164 | LOC389386 | ILMN_165610 | UP   | PREDICTED: misc_RNA (LOC389386), partial miscRNA.                                                                                        |
| 4780044 | LOC389386 | ILMN_352098 | UP   | PREDICTED: misc_RNA (LOC389386), partial miscRNA.                                                                                        |
| 2350121 | LOC642678 | ILMN_38908  | UP   | PREDICTED: similar to myeloid/lymphoid or mixed-lineage leukemia 3 isoform 2 (LOC642678), mRNA.                                          |
| 6480364 | LOC647460 | ILMN_38026  | DOWN | PREDICTED: similar to Ig kappa chain V-I region HK101 precursor (LOC647460), mRNA.                                                       |
| 6900291 | LOC649210 | ILMN_33006  | DOWN | PREDICTED: similar to Ig lambda chain V region 4A precursor (LOC649210), mRNA.                                                           |
| 830639  | LOC653778 | ILMN_32201  | DOWN | PREDICTED: similar to solute carrier family 25, member 37 (LOC653778), mRNA.                                                             |
| 2260349 | MIR1974   | ILMN_388657 | DOWN | microRNA 1974 (MIR1974), microRNA.                                                                                                       |
| 830750  | NCF1B     | ILMN_168368 | UP   | neutrophil cytosolic factor 1B pseudogene (NCF1B), non-coding RNA.                                                                       |
| 6760593 | OSBPL10   | ILMN_11112  | UP   | oxysterol binding protein-like 10 (OSBPL10), mRNA.                                                                                       |
| 3170246 | PDCD1LG2  | ILMN_3561   | UP   | programmed cell death 1 ligand 2 (PDCD1LG2), mRNA.                                                                                       |
| 2000292 | SCGB3A1   | ILMN_23096  | DOWN | secretoglobin, family 3A, member 1 (SCGB3A1), mRNA.                                                                                      |
| 160368  | SEMA6B    | ILMN_21277  | DOWN | sema domain, transmembrane domain (TM), and cytoplasmic domain, (semaphorin) 6B (SEMA6B), mRNA.                                          |
| 1400593 | SIGLEC14  | ILMN_309673 | UP   | sialic acid binding Ig-like lectin 14 (SIGLEC14), mRNA.                                                                                  |
| 460463  | SMARCD3   | ILMN_19301  | UP   | SWI/SNF related, matrix associated, actin dependent regulator of chromatin, subfamily d, member 3 (SMARCD3), transcript variant 1, mRNA. |
| 540520  | SNORD8    | ILMN_366693 | UP   | small nucleolar RNA, C/D box 8 (SNORD8), small nucleolar RNA.                                                                            |
| 1240554 | TNFRSF17  | ILMN_17574  | UP   | tumor necrosis factor receptor superfamily, member 17 (TNFRSF17), mRNA.                                                                  |
| 4760747 | TPST1     | ILMN_174128 | UP   | tyrosylprotein sulfotransferase 1 (TPST1), mRNA.                                                                                         |
| 2630195 | VAMP5     | ILMN_20179  | DOWN | vesicle-associated membrane protein 5 (myobrevin) (VAMP5), mRNA.                                                                         |
| 3940088 | ZBED2     | ILMN_4927   | DOWN | zinc finger, BED-type containing 2 (ZBED2), mRNA.                                                                                        |

§ in TB patients in relation to patients with other diseases. 3 probes are also in the TB/LTBI signature (in bold), no probes overlap with the Berry *et al.* 86 probe adult signature.

**Table S3. Diagnostic performance of the disease risk score based on the TB vs. LTBI signature in the SA/Malawi test set.**

Test set:  $n_{TB}=23$   $n_{LTBI}=11$ , Validation cohort:  $n_{TB}=35$   $n_{LTBI}=14$ .

|                                      | Test set SA and Malawi | Kenya Validation Cohort  |
|--------------------------------------|------------------------|--------------------------|
| HIV- & HIV+ combined                 |                        |                          |
| TB vs. LTBI 42 transcript DRS        |                        |                          |
| <b>Area under ROC curve (95% CI)</b> | 98.4<br>(94.5 - 100.0) | 100.0<br>(100.0 - 100.0) |
| <b>Sensitivity % (95% CI)</b>        | 95.7<br>(87.0 - 100.0) | 94.3<br>(85.7 - 100.0)   |
| <b>Specificity % (95% CI)</b>        | 90.9<br>(72.7 - 100.0) | 100.0<br>(100.0 - 100.0) |

**Table S4. Strategy for selection of culture-negative TB.**

We selected numbers of each category (highly probable, probable, and possible TB) for inclusion in the microarray study, to match the expected number of true TB contributed by each sub-group to the overall culture negative group. We assumed 80%, 50%, 40% prevalence of TB among the highly probable, probable and possible TB respectively based on the differing clinical certainty of correct diagnosis in each category. As shown in the table below, the arrayed samples in each category closely followed the predicted proportions of true TB contributed by each group.

| <b>Group</b>       | <b>Number of samples recruited</b> | <b>Prevalence of TB in group</b> | <b>Expected number of actual TB cases</b> | <b>Proportion of expected number of cases</b> | <b>Number of cases arrayed</b> | <b>Proportion of cases arrayed</b> |
|--------------------|------------------------------------|----------------------------------|-------------------------------------------|-----------------------------------------------|--------------------------------|------------------------------------|
| Highly probable TB | 15                                 | 80%                              | 12                                        | 17%                                           | 8                              | 18%                                |
| Probable TB        | 64                                 | 50%                              | 32                                        | 45%                                           | 19                             | 43%                                |
| Possible TB        | 66                                 | 40%                              | 26                                        | 38%                                           | 17                             | 39%                                |
| Total              | 145                                |                                  | 70                                        | 100%                                          | 44                             | 100%                               |

**Table S5a. Comparison of culture-negative TB cases included in & excluded from the array analysis by diagnostic category for the validation cohort.**

|                                                  | Highly probable TB |        |                |       | Probable TB     |    |                 |    | Possible TB     |       |                 |       |                      |       |      |
|--------------------------------------------------|--------------------|--------|----------------|-------|-----------------|----|-----------------|----|-----------------|-------|-----------------|-------|----------------------|-------|------|
|                                                  | Included (n=8)     |        | Excluded (n=7) |       | Included (n=19) |    | Excluded (n=45) |    | Included (n=17) |       | Excluded (n=49) |       | p value <sup>2</sup> |       |      |
| <b>Tuberculosis exposure<sup>1</sup></b>         |                    |        |                |       |                 |    |                 |    |                 |       |                 |       |                      |       |      |
| Close TB contact history                         | 5                  | (63%)  | 2              | (29%) | 0.31            | 11 | (58%)           | 10 | (22%)           | 0.009 | 5               | (29%) | 8                    | (16%) | 0.29 |
| TST positive                                     | 8                  | (100%) | 6              | (86%) | 0.47            | 6  | (39%)           | 13 | (29%)           | 1     | 1               | (6%)  | 1                    | (2%)  | 0.45 |
| Tuberculosis exposure                            | 8                  | (100%) | 6              | (86%) | 0.47            | 13 | (68%)           | 20 | (44%)           | 0.10  | 5               | (29%) | 8                    | (16%) | 0.29 |
| <b>Clinical symptoms/signs of TB<sup>1</sup></b> |                    |        |                |       |                 |    |                 |    |                 |       |                 |       |                      |       |      |
| Persistent cough >2 weeks                        | 5                  | (63%)  | 5              | (71%) | 1               | 11 | (58%)           | 30 | (67%)           | 0.57  | 12              | (71%) | 30                   | (61%) | 0.57 |
| Persistent fever >2 weeks                        | 4                  | (50%)  | 4              | (57%) | 1               | 6  | (32%)           | 27 | (60%)           | 0.06  | 8               | (47%) | 33                   | (67%) | 0.16 |
| Night sweats >2 weeks                            | 3                  | (38%)  | 3              | (43%) | 1               | 6  | (32%)           | 7  | (16%)           | 0.18  | 3               | (18%) | 10                   | (20%) | 1    |
| Weight loss or failure to thrive                 | 7                  | (88%)  | 6              | (86%) | 1               | 12 | (63%)           | 28 | (62%)           | 1     | 12              | (71%) | 34                   | (69%) | 1    |
| <b>CXR features of TB<sup>1</sup></b>            |                    |        |                |       |                 |    |                 |    |                 |       |                 |       |                      |       |      |
| Airway compression                               | 1                  | (13%)  | 0              | (0%)  | 1               | 1  | (5%)            | 0  | (5%)            | 0.30  | 0               | (0%)  | 0                    | (0%)  | -    |
| Lymphadenopathy                                  | 6                  | (75%)  | 6              | (86%) | 1               | 7  | (37%)           | 19 | (42%)           | 0.78  | 1               | (6%)  | 4                    | (8%)  | 1    |
| Airspace shadowing                               | 3                  | (38%)  | 2              | (29%) | 1               | 9  | (47%)           | 18 | (40%)           | 0.59  | 3               | (18%) | 15                   | (31%) | 0.36 |
| Miliary/nodular shadowing                        | 0                  | (0%)   | 0              | (0%)  | -               | 1  | (5%)            | 1  | (2%)            | 0.51  | 1               | (6%)  | 1                    | (2%)  | 0.45 |
| Pleural effusion                                 | 0                  | (0%)   | 1              | (14%) | 0.47            | 2  | (11%)           | 2  | (4%)            | 0.58  | 0               | (0%)  | 1                    | (2%)  | 1    |
| Cavities                                         | 0                  | (0%)   | 0              | (0%)  | -               | 2  | (11%)           | 3  | (7%)            | 0.63  | 0               | (0%)  | 1                    | (2%)  | 1    |
| Calcified Ghon focus                             | 0                  | (0%)   | 0              | (0%)  | -               | 0  | (0%)            | 0  | (0%)            | -     | 0               | (0%)  | 0                    | (0%)  | -    |
| Vertebral spondylitis                            | 0                  | (0%)   | 0              | (0%)  | -               | 0  | (0%)            | 0  | (0%)            | -     | 0               | (0%)  | 0                    | (0%)  | -    |

<sup>1</sup> See reference<sup>13</sup>

<sup>2</sup> Fisher's exact 2-sided test

**Table S5b. Comparison of OD cases included in & excluded from the array analysis by diagnostic category for the validation cohort.**

|                                                  | Included<br>(n=64) |       | Excluded<br>(n=935) |        | p value <sup>2</sup> |
|--------------------------------------------------|--------------------|-------|---------------------|--------|----------------------|
| <b>Tuberculosis exposure<sup>1</sup></b>         |                    |       |                     |        |                      |
| Close TB contact history                         | 6                  | (9%)  | 143                 | (15%)  | 0.28                 |
| TST positive                                     | 4                  | (6%)  | 118                 | (13%)  | 0.17                 |
| Tuberculosis exposure                            | 16                 | (25%) | 297                 | (32%)  | 0.27                 |
| <b>Clinical symptoms/signs of TB<sup>1</sup></b> |                    |       |                     |        |                      |
| Persistent cough >2 weeks                        | 23                 | (36%) | 433                 | (47%)  | 0.12                 |
| Persistent fever >2 weeks                        | 21                 | (33%) | 379                 | (41%)  | 0.24                 |
| Night sweats >2 weeks                            | 10                 | (16%) | 143                 | (15%)  | 1                    |
| Weight loss or failure to thrive                 | 50                 | (78%) | 514                 | (56%)  | <0.001               |
| <b>CXR features of TB<sup>1</sup></b>            |                    |       |                     |        |                      |
| Airway compression                               | 0                  | (0%)  | 2                   | (0.2%) | 1                    |
| Lymphadenopathy                                  | 5                  | (8%)  | 67                  | (7%)   | 0.80                 |
| Airspace shadowing                               | 17                 | (27%) | 156                 | (17%)  | 0.06                 |
| Miliary/nodular shadowing                        | 0                  | (0%)  | 0                   | (0%)   | -                    |
| Pleural effusion                                 | 4                  | (6%)  | 17                  | (2%)   | 0.04                 |
| Cavities                                         | 0                  | (0%)  | 1                   | (0.1%) | 1                    |
| Calcified Ghon focus                             | 0                  | (0%)  | 0                   | (0%)   | -                    |
| Vertebral spondylitis                            | 0                  | (0%)  | 0                   | (0%)   | -                    |

<sup>1</sup> See reference<sup>13</sup>

<sup>2</sup> Fisher's exact 2-sided test

**Table S6. Diagnostic performance of the TB/OD disease risk score in the SA/Malawi test set and the Kenyan validation cohort and comparison with Xpert MTB/RIF by HIV status.**

|                                      | Test set SA and Malawi        |                        | Kenyan Independent Validation Cohort |                        |                          |                          |
|--------------------------------------|-------------------------------|------------------------|--------------------------------------|------------------------|--------------------------|--------------------------|
|                                      | TB/OD 51 transcript signature |                        |                                      |                        | Xpert MTB/RIF            |                          |
|                                      | HIV-                          | HIV+                   | HIV-                                 | HIV+                   | HIV-                     | HIV+                     |
| <b>Number of participants</b>        | TB=14<br>OD=21                | TB=9<br>OD=13          | TB=25<br>OD=29                       | TB=10<br>OD=26         | TB=25<br>OD=29           | TB=10<br>OD=26           |
| <b>Area under ROC curve (95% CI)</b> | 88.4<br>(75.9 - 97.6)         | 84.6<br>(64.0 - 96.6)  | 85.7<br>(75.0 - 94.4)                | 93.9<br>(83.9 - 100.0) | 74.0<br>(64.0 - 84.0)    | 85.0<br>(70.0 - 95.1)    |
| <b>Sensitivity % (95% CI)</b>        | 78.6<br>(57.1 - 100.0)        | 77.8<br>(55.6 - 100.0) | 80.0<br>(64.0 - 92.0)                | 90.0<br>(70.0 - 100.0) | 48.0<br>(28.0 - 64.1)    | 70.0<br>(40.0 - 100.0)   |
| <b>Specificity % (95% CI)</b>        | 81.0<br>(61.9 - 95.2)         | 61.5<br>(30.8 - 84.6)  | 79.3<br>(65.4 - 93.1)                | 92.3<br>(80.8 - 100.0) | 100.0<br>(100.0 - 100.0) | 100.0<br>(100.0 - 100.0) |

**Table S7. Diagnostic performance of the TB/OD disease risk score and the Xpert MTB/RIF on culture-negative TB samples from the Kenyan validation cohort.**

|                                                                                 |                                                  | Area under ROC curve % (95% CI) | Sensitivity % (95% CI) | Effective Sensitivity % (95% CI) |                        |                        |
|---------------------------------------------------------------------------------|--------------------------------------------------|---------------------------------|------------------------|----------------------------------|------------------------|------------------------|
| <b>Highly Probable TB vs. OD</b><br>(n <sub>TB</sub> =8<br>n <sub>OD</sub> =55) | <b>Estimated “actual” TB prevalence in group</b> | <b>100%</b>                     | <b>100%</b>            | <b>70%</b>                       | <b>80%</b>             | <b>90%</b>             |
|                                                                                 | <b>DRS 51 TB vs. OD signature</b>                | 77.5<br>(58.2 – 94.3)           | 62.5<br>(25.0 – 100.0) | 82.3<br>(41.9 – 100.0)           | 74.1<br>(37.6 – 100.0) | 67.6<br>(35.1 – 100.0) |
|                                                                                 | <b>Xpert MTB/RIF®*</b>                           | 62.5<br>(50.0 – 81.3)           | 25.0<br>(0.0 – 50.0)   | 35.7<br>(1.1 – 65.7)             | 31.3<br>(1.0 – 57.6)   | 27.8<br>(1.0 – 51.3)   |
| <b>Probable TB vs. OD</b><br>(n <sub>TB</sub> =19<br>n <sub>OD</sub> =55)       | <b>Estimated “actual” TB prevalence in group</b> | <b>100%</b>                     | <b>100%</b>            | <b>40%</b>                       | <b>50%</b>             | <b>60%</b>             |
|                                                                                 | <b>DRS 51 TB vs. OD signature</b>                | 72.3<br>(59.6 – 84.2)           | 42.1<br>(21.1 – 63.2)  | 80.8<br>(36.4 – 100.0)           | 67.9<br>(32.7 – 100.0) | 59.3<br>(30.2 – 90.6)  |
|                                                                                 | <b>Xpert MTB/RIF®*</b>                           | 52.6<br>(50.0 – 57.9)           | 5.3<br>(0.0 – 17.8)    | 13.3<br>(0.0 – 36.5)             | 10.6<br>(0.0 – 29.3)   | 8.8<br>(0.0 – 24.5)    |
| <b>Possible TB vs. OD</b><br>(n <sub>TB</sub> =17<br>n <sub>OD</sub> =55)       | <b>Estimated “actual” TB prevalence in group</b> | <b>100%</b>                     | <b>100%</b>            | <b>30%</b>                       | <b>40%</b>             | <b>50%</b>             |
|                                                                                 | <b>DRS 51 TB vs. OD signature</b>                | 64.5<br>(48.4 – 77.7)           | 35.3<br>(11.8 – 58.8)  | 79.6<br>(7.2 – 100.0)            | 63.8<br>(9.2 – 100.0)  | 54.3<br>(10.2 – 91.0)  |
|                                                                                 | <b>Xpert MTB/RIF®*</b>                           | 50.0<br>(50.0 – 50.0)           | 0.0<br>(0.0 – 0.0)     | 0.0<br>(0.0 – 0.0)               | 0.0<br>(0.0 – 0.0)     | 0.0<br>(0.0 – 0.0)     |

\* The Xpert MTB/RIF test had a positive outcome for 3 out of 44 culture-negative TB cases and 0 out of 55 other diseases cases.

Specificity remains the same as in Table 2.

**Table S8. Positive and Negative predictive value for the Kenyan validation cohort in different prevalence scenarios & based on the sensitivity in both culture-negative and culture-positive TB groups.**

| Combined sensitivity <sup>a</sup> | Statistic         | Prevalence <sup>b</sup> |                       |                        |
|-----------------------------------|-------------------|-------------------------|-----------------------|------------------------|
|                                   |                   | 10%                     | 30%                   | 50%                    |
| A: 70%                            | PPV %<br>(95% CI) | 38.3<br>(23.4 – 53.3)   | 70.5<br>(57.4 – 83.7) | 84.8<br>(76.6 – 943.0) |
|                                   | NPV %<br>(95% CI) | 93.6<br>(94.9 – 97.7)   | 87.1<br>(82.8 – 91.5) | 74.4<br>(67.0 – 81.8)  |
| B: 75%                            | PPV %<br>(95% CI) | 41.0<br>(25.8 – 56.3)   | 72.9<br>(60.4 – 85.3) | 86.2<br>(78.7 – 93.7)  |
|                                   | NPV %<br>(95% CI) | 96.9<br>(95.5 – 98.2)   | 89<br>(84.6 – 93.4)   | 77.6<br>(69.8 – 85.4)  |
| C: 82%                            | PPV %<br>(95% CI) | 44.3<br>(28.8 – 59.8)   | 75.4<br>(63.8 – 87.1) | 87.8<br>(81.0 – 94.5)  |
|                                   | NPV %<br>(95% CI) | 97.8<br>(96.5 – 99.0)   | 91.9<br>(87.6 – 96.1) | 82.9<br>(74.9 – 90.9)  |

<sup>a</sup> Combined sensitivity is defined as the average sensitivity across all culture-negative and -positive TB groups. This is calculated by weighting the adjusted sensitivity calculated in each group by the relative size of each group in the Kenyan prospective cohort. This sensitivity is calculated according to three scenarios, as described in methods, and depends on an assumption as to the prevalence of 'actual' TB in each group.

A: Definite TB (100%) + HP TB (90%) +Pr TB (60%) + Pos TB (50%)

B: Definite TB (100%) + HP TB (80%) +Pr TB (50%) + Pos TB (40%)

C: Definite TB (100%) + HP TB (70%) +Pr TB (40%) + Pos TB (30%)

<sup>b</sup> Prevalence represents the prevalence of actual TB in the group of children to which test is given

10%: reflects the prevalence of TB in the Kenyan cohort

30%: reflects the prevalence of TB from the South Africa and Malawi recruitment

50%: reflects a scenario which includes prior filtering or a combination with another test



## References

1. WHO. Global tuberculosis control. Geneva: World Health Organisation; 2011.
2. Kranzer K, van Schaik N, Karmue U, et al. High prevalence of self-reported undiagnosed HIV despite high coverage of HIV testing: a cross-sectional population based sero-survey in South Africa. PLoS One 2011;6:e25244.
3. WHO UNICEF UNAIDS. Global HIV/AIDS response, epidemic update and health sector progress towards universal access. Geneva2011.
4. van Well GT, Paes BF, Terwee CB, et al. Twenty years of pediatric tuberculous meningitis: a retrospective cohort study in the western cape of South Africa. Pediatrics 2009;123:e1-8.
5. National Statistical Office. Malawi Demographic and Health Survey 2004. Zomba, Malawi: National Statistical Office; 2005 December 2005.
6. Brooker SJ, Pullan RL, Gitonga CW, et al. Plasmodium-helminth coinfection and its sources of heterogeneity across East Africa. The Journal of infectious diseases 2012;205:841-52.
7. Kenya National Bureau of Statistics. Kenya Demographic and Health Survey 2008-09. Nairobi2010.
8. Brent AJ, Ahmed I, Ndiritu M, et al. Incidence of clinically significant bacteraemia in children who present to hospital in Kenya: community-based observational study. Lancet 2006;367:482-8.
9. Schmid R, Baum P, Ittrich C, et al. Comparison of normalization methods for Illumina BeadChip HumanHT-12 v3. BMC Genomics 2010;11:349.
10. Jolliffe IT. Principal Component Analysis: Springer-Verlag; 1986.
11. Hotelling H. The generalization of Student's ratio. Annals of Mathematical Statistics 1931;2:360-78.
12. Zou H, Hastie T. Regularization and variable selection via the elastic net. J Roy Stat Soc B 2005;67:301-20.
13. Graham SM, Ahmed T, Amanullah F, et al. Evaluation of tuberculosis diagnostics in children: 1. Proposed clinical case definitions for classification of intrathoracic tuberculosis disease. Consensus from an expert panel. The Journal of infectious diseases 2012;205 Suppl 2:S199-208.
